# Supplementary material for: Antioxidant and Anticancer Potential of the New Cu(II) Complexes Bearing Imine-Phenolate Ligands with Pendant Amine N-Donor Groups
Source: MDPI journal article supplement (doi:10.3390/pharmaceutics15020376), 2023-01-22
Supplement: s1 [file s1]

# Antioxidant and Anticancer Potential of the New Cu(II) Complexes Bearing Imine-Phenolate Ligands with Pendant Amine N-Donor Groups

Adriana Castro Pinheiro <sup>1,2</sup>, Ianka Jacondino Nunes <sup>2</sup>, Wesley Vieira Ferreira <sup>2</sup>, Paula Pellenz Tomasini <sup>1</sup>, Cristiano Trindade <sup>1,3</sup>, Carolina Cristóvão Martins <sup>4</sup>, Ethel Antunes Wilhelm <sup>4</sup>, Robson da Silva Oliboni <sup>2</sup>, Paulo Augusto Netz <sup>5</sup>, Rafael Stieler <sup>6</sup>, Osvaldo de Lazaro Casagrande, Jr. <sup>6</sup> and Jenifer Saffi <sup>1,\*</sup>

<sup>1</sup> Laboratory of Genetic Toxicology, Department of Basic Health Sciences, Federal University of Health Sciences of Porto Alegre (UFCSPA), Porto Alegre 90050-170, RS, Brazil

<sup>2</sup> Group of Catalysis of Theoretical Studies, Center of Chemical, Pharmaceutical and Food Science Center, Federal University of Pelotas (UFPel), Pelotas 96160-000, RS, Brazil

<sup>3</sup> Centro de Investigaciones en Ciencias de la Vida, Universidad Simón Bolívar, Barranquilla 080002, Colombia

<sup>4</sup> Laboratory in Biochemical Pharmacology, Center of Chemical, Pharmaceutical and Food Sciences, Federal University of Pelotas (UFPel), Pelotas 96160-000, RS, Brazil

<sup>5</sup> Grupo de Química Teórica, Instituto de Química, Universidade Federal do Rio Grande do Sul (UFRGS), Porto Alegre 91501-970, RS, Brazil

<sup>6</sup> Laboratory of Molecular Catalysis, Instituto de Química, Universidade Federal do Rio Grande do Sul (UFRGS), Porto Alegre 91501-970, RS, Brazil

\* Correspondence: [jenifers@ufcspa.edu.br](mailto:jenifers@ufcspa.edu.br)

## Table of Contents

**Figure S1.**  $^1\text{H}$  NMR spectrum (400 MHz,  $\text{CDCl}_3$ , 298 K) of **1a**

**Figure S2.**  $^{13}\text{C}$  NMR spectrum (100 MHz,  $\text{CDCl}_3$ , 298 K) of **1a**

**Figure S3.**  $^1\text{H}$  NMR spectrum (400 MHz,  $\text{CDCl}_3$ , 298 K) of **1b**

**Figure S4.**  $^{13}\text{C}$  NMR spectrum (100 MHz,  $\text{CDCl}_3$ , 298 K) of **1b**

**Figure S5.** ESI-HRMS spectrum for complex **2a**.

**Figure S6.** ESI-HRMS spectrum for complex **2b**.

**Figure S7.** ESI-HRMS spectrum for complex **2b** (isotopic profile).

**Figure S8.** UV-Vis spectra of **1a** and its complex **2a** ( $1 \times 10^{-4}$  M) in dichloromethane.

**Figure S9.** UV-Vis spectra of **1b** and its complex **2b** ( $1 \times 10^{-4}$  M) in dichloromethane.

**Figure S10.** Intermolecular hydrogen bonds between two mononuclear species of complex **2a** (thermal ellipsoids drawn at 60% probability level). For clarity the hydrogen atoms not-involved in the hydrogen bonds have been omitted. (N(3)-H(3A)···Cl(2)#2,  $d(\text{H}\cdots\text{A}) = 2.24 \text{ \AA}$ ,  $d(\text{D}\cdots\text{A}) = 3.2036(17) \text{ \AA}$ ,  $\angle(\text{D-H}\cdots\text{A}) = 160.2^\circ$ ) (#1 = 2-x, 1-y, 1-z; #2 = 1-x, -y, 1-z).

**Figure S11.** UV-Vis spectra of **1a** ( $1 \times 10^{-7}$  M) in DMSO (250 – 800 nm).

**Figure S12.** UV-Vis spectra of **1b** ( $1 \times 10^{-7}$  M) in DMSO (250 – 800 nm).

**Figure S13.** UV-Vis spectra of **2a** ( $1 \times 10^{-7}$  M) in DMSO (250 – 1000 nm).

**Figure S14.** UV-Vis spectra of **2b** ( $1 \times 10^{-7}$  M) in DMSO (250 – 1000 nm).

**Figure S15.** UV-Vis spectra of **2a** ( $1 \times 10^{-7}$  M) in  $\text{H}_2\text{O}$  (250 – 1000 nm).

**Figure S16.** UV-Vis spectra of **2b** ( $1 \times 10^{-7}$  M) in H<sub>2</sub>O (250 – 1000 nm).

**Figure S17.** Cyclic voltammograms of ligands **1a-b** and Cu(II) complexes **2a-b**, in DMF solution at 100 mV/s scan rate, corresponding to the **1a** (a), **2a** (b), **1b** (c) and **2b** (d).

**Figure S18.** Effect of ligands and Cu(II) complexes represented by the **1a** (a), **2a** (b), **1b** (c), **2b** in different concentrations on DPPH radical-scavenger activity. Data are expressed as the mean  $\pm$  SEM for three independent experiments, carried out on different days. The results are calculated as % of control of the absorbance at 517 nm. Asterisk denotes significance levels when compared to control group: (\*)  $P < 0.05$ , (\*\*\*)  $P < 0.001$  and (\*\*\*\*)  $P < 0.0001$  (One-way ANOVA followed by the Newman-Keul's test).

**Figure S19.** Effect of ligands and Cu(II) complexes represented by the **1a** (a), **2a** (b), **1b** (c), **2b** in different concentrations on ABTS<sup>+</sup> radical-scavenger activity. Data are expressed as the mean  $\pm$  SEM for three independent experiments, carried out on different days. The results are calculated as % of control of the absorbance at 730 nm. Asterisk denotes significance levels when compared to control group: (\*)  $P < 0.05$ , (\*\*\*)  $P < 0.001$  and (\*\*\*\*)  $P < 0.0001$  (One-way ANOVA followed by the Newman-Keul's test).

**Figure S20.** Comparison of the dose-response survival diagrams of MRC-5, MCF-7 and

SW620 cell lines exposed to **1a** and **1b** free ligand (0 – 100  $\mu$ M) for 24 h or 72 h. The obtained values represent an average of at least three independent experiments. NC represents the negative control. Graphs represent the average  $\pm$  SD. Statistical analysis were performed using One-way ANOVA followed by Dunnett's multiple comparison test and  $p < 0.05$  was considered as significant. \*  $p = 0.0189$  (d), 0.0145 (e), 0.0224 (f); \*\*  $p = 0.0027$  (a), 0.0015 (d); \*\*\*  $p = 0.0010$  (c) and (f), 0.0003 (d); \*\*\*\*  $p = <0.0001$ .

**Figure S21.** Comparison of the dose-response survival diagrams of MRC-5, MCF-7 and SW620 cell lines exposed to complex **2a** (0 – 100  $\mu$ M) for 24 h and 72 h. The obtained values represent an average of at least three independent experiments. NC represents the negative control. Graphs represent the average  $\pm$  SD. Statistical analysis were performed using One-way ANOVA followed by Dunnett's multiple comparison test and  $p < 0.05$  was considered as significant. \*  $p = 0.0141$  (a); 0.0185 (24 h - b), 0.0445 (72 h -b), \*\*  $p = 0.0026$  (b), 0.0036 (24 h - c), 0.0017 (72 h - c) \*\*\*  $p = 0.0002$  (a); 0.0009 (24 h-b), 0.0004 (72 h -b), \*\*\*\*  $p = <0.0001$ .

**Figure S22.** Colony Survival for **1a**, **1b**, **2a** and **2b** on MRC-5, MCF-7 and SW620. Data represent mean and SD of 3 independent experiments. One-way ANOVA and Dunnett's posttest. (\*) $p < 0.05$ ; (\*\*)  $p < 0.01$ ; (\*\*\*)  $p < 0.001$ .

**Figure S23.** Two-dimensional interaction diagram of complexes (a) **2a** and (b) **2b** with DNA (PDB: 1BDNA).

**Figure S24.** (a) An alternative docking pose for **2b** with an affinity value of  $-7.4$  kcal mol $^{-1}$ . (b) Two-dimensional interaction diagram of this mode with DNA.

**Table S1.** Crystallographic data and structure refinement parameters for **2a**.

**Table S2.** Selected geometrical properties of compounds **2a**, **2a'** and **2b** at the B3LYP/def2-TZVPP/def2-SVP level of theory. Distances are in angstroms and angles in degrees.

Coordinates xyz : Coordinates from ORCA-job **2a**.

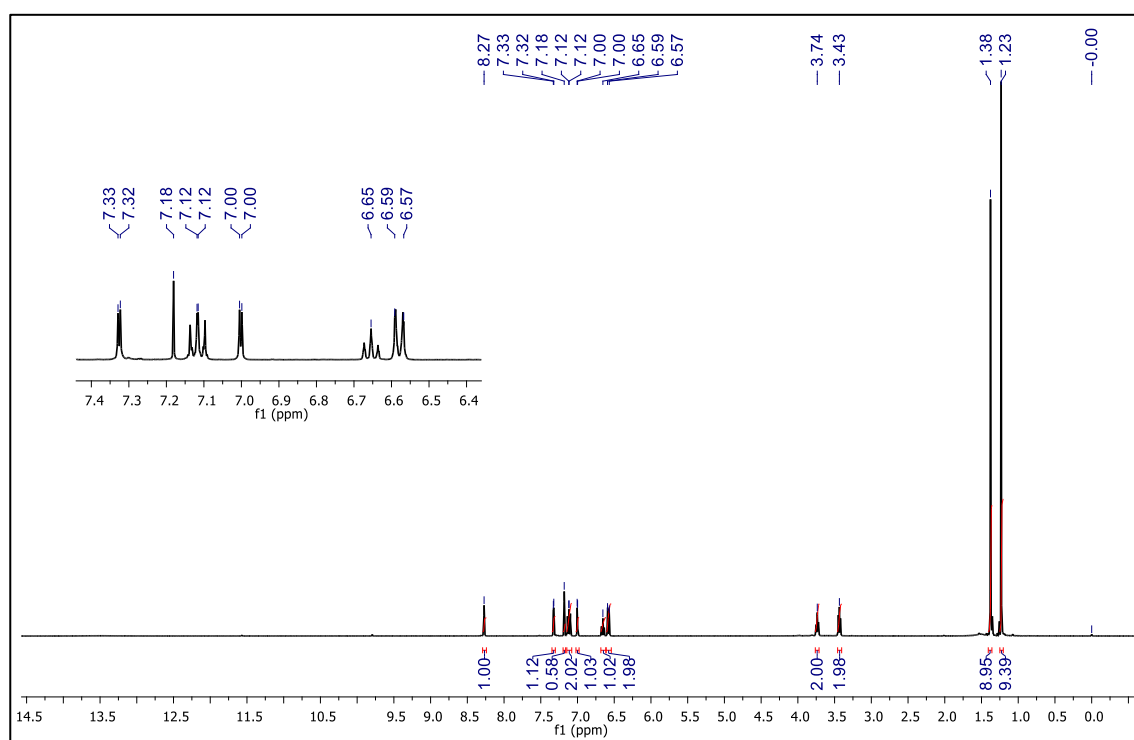

**Figure S1.**  $^1\text{H}$ NMR (400 MHz,  $\text{CDCl}_3$ , rt) spectrum of ligand **1a**.

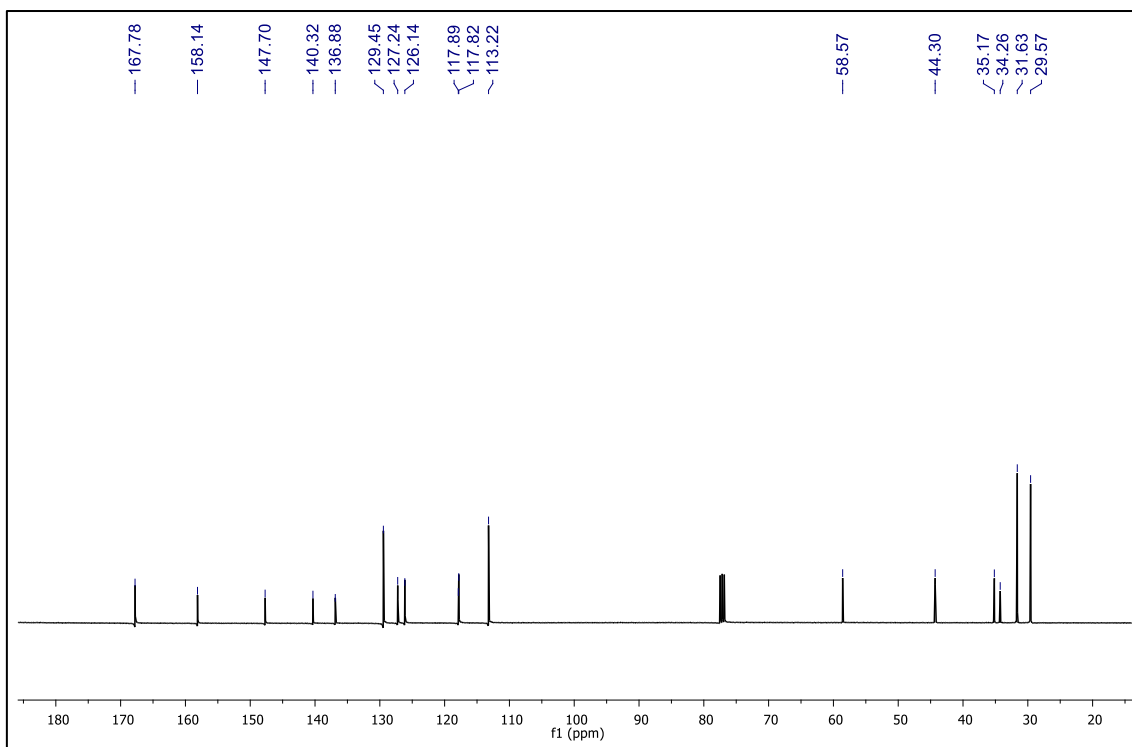

**Figure S2.**  $^{13}\text{C}\{^1\text{H}\}$  NMR (101 MHz,  $\text{CDCl}_3$ , rt) spectra of ligand **1a**.

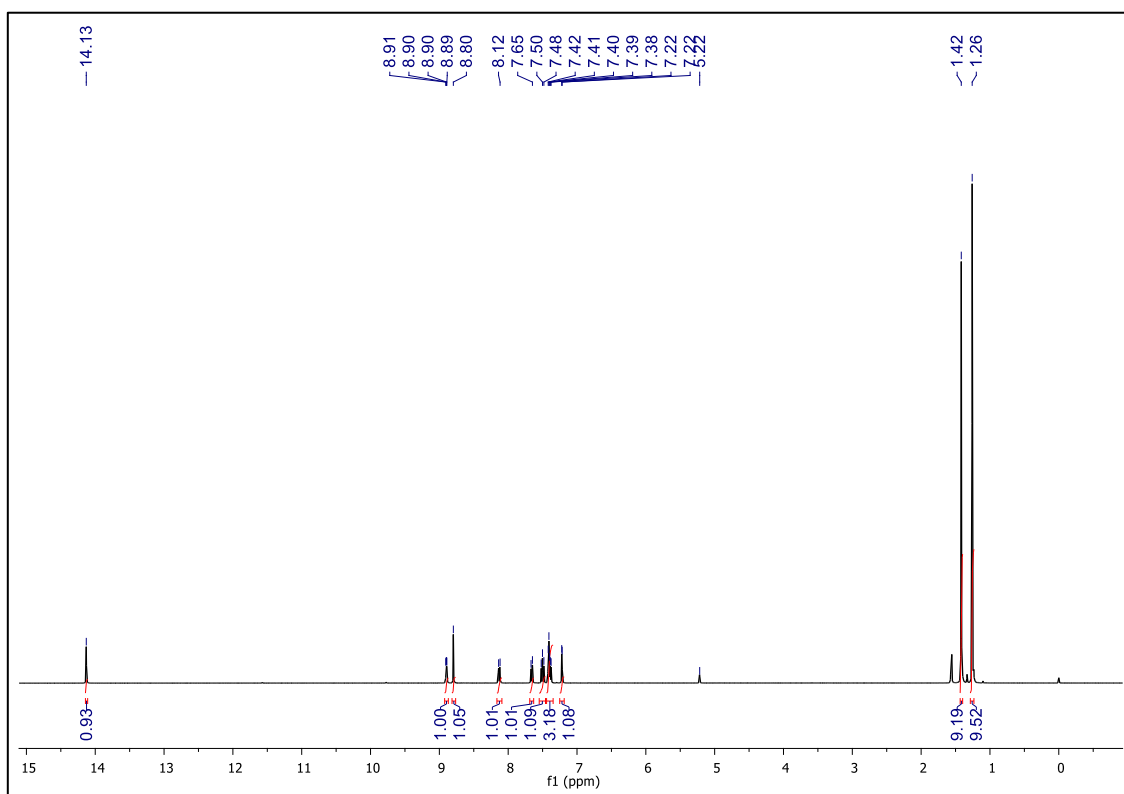

**Figure S3.**  $^1\text{H}$ NMR (400 MHz,  $\text{CDCl}_3$ , rt) spectrum of ligand **1b**.

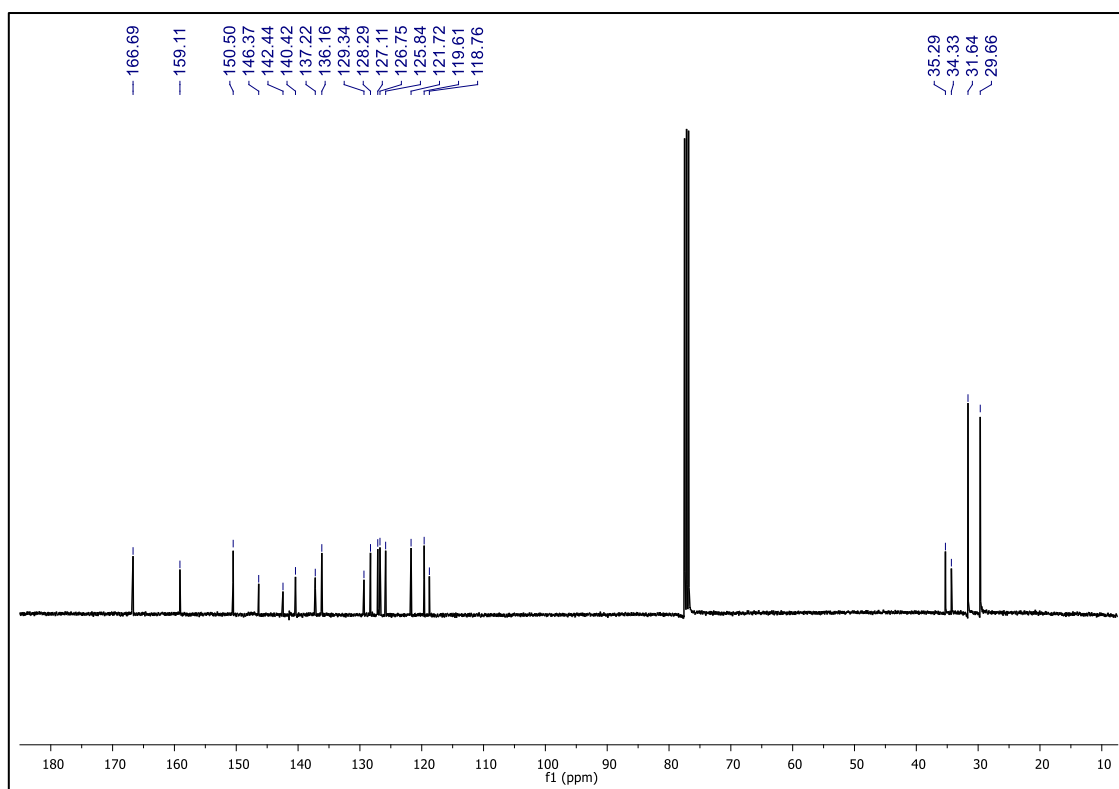

**Figure S4.**  $^{13}\text{C}\{^1\text{H}\}$  NMR (101 MHz,  $\text{CDCl}_3$ , rt) spectra of ligand **1b**.

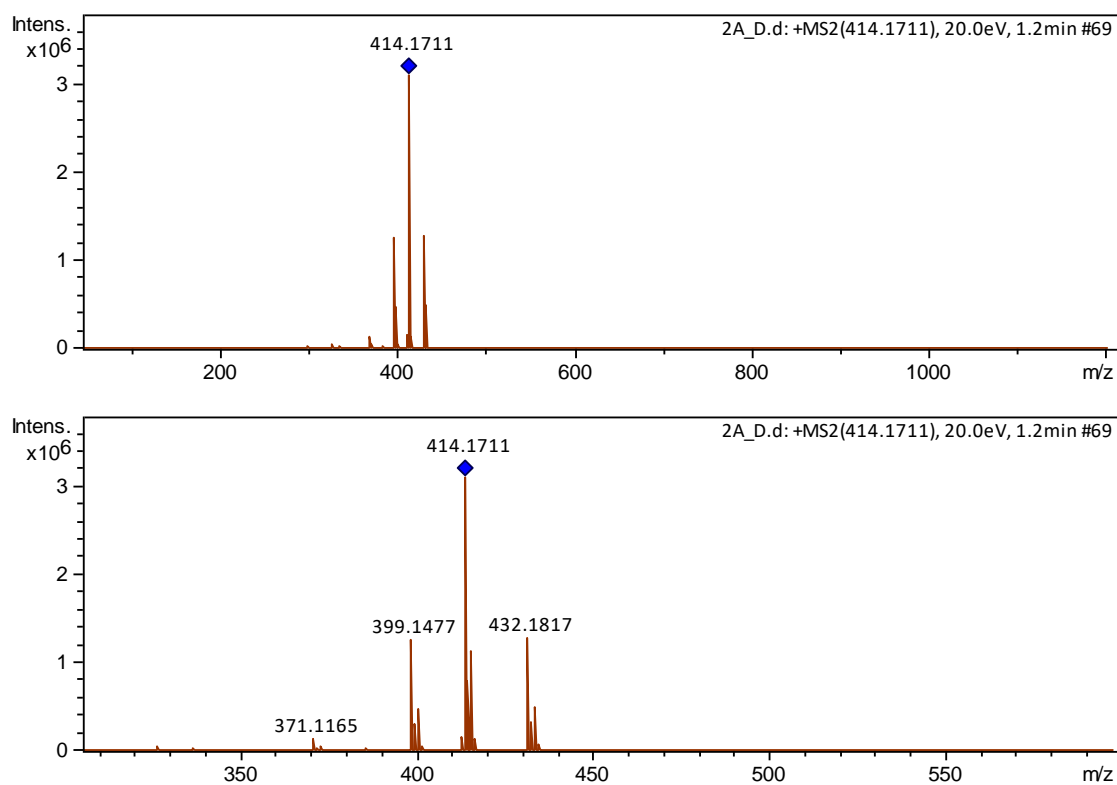

**Figure S5.** ESI-HRMS spectrum for complex **2a**.

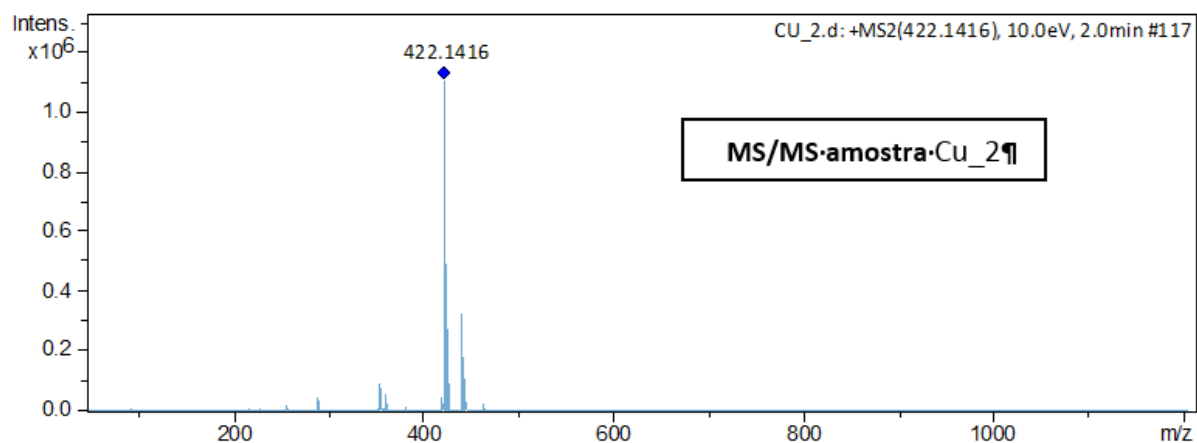

**Figure S6.** ESI-HRMS spectrum for complex **2b**.

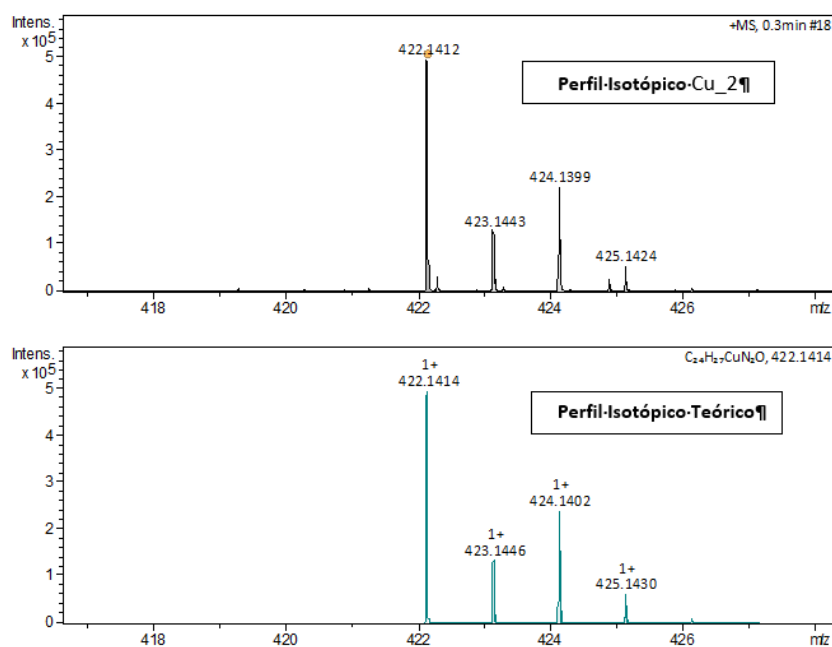

**Figure S7.** ESI-HRMS spectrum for complex **2b** (isotopic profile).



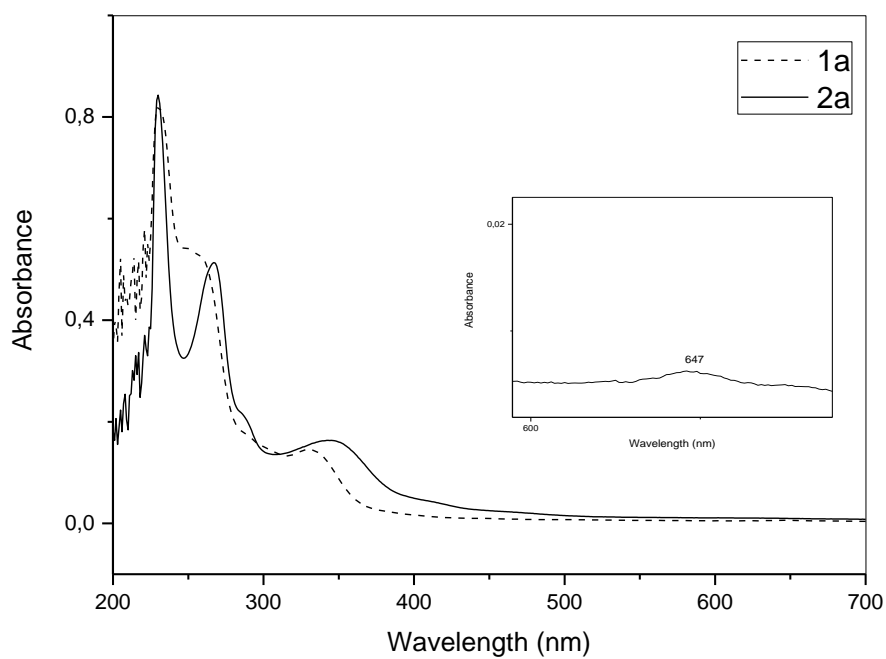

**Figure S8.** UV-Vis spectra of **1a** and its complex **2a** ( $1 \times 10^{-4}$  M) in dichloromethane.

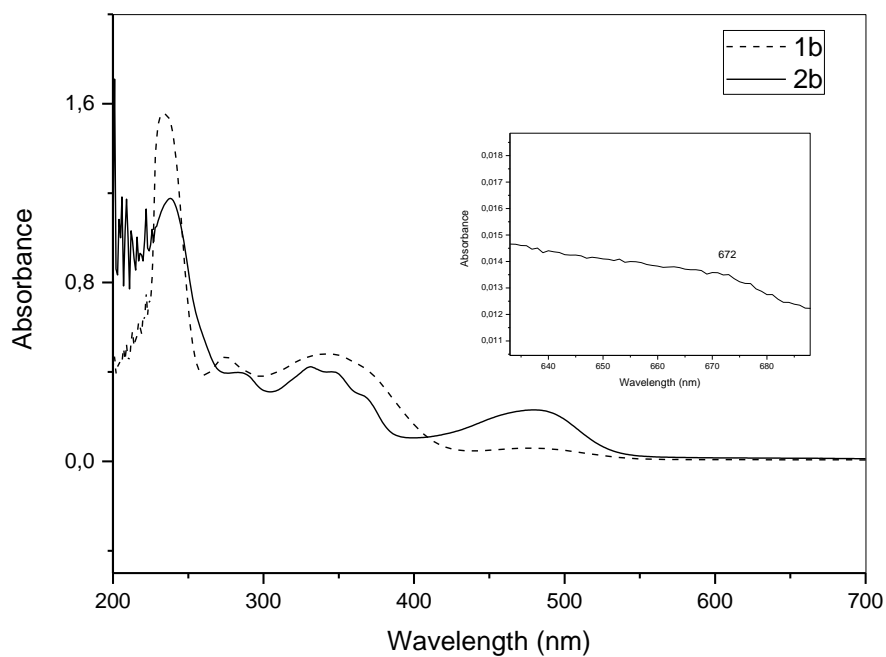

**Figure S9.** UV-Vis spectra of **1b** and its complex **2b** ( $1 \times 10^{-4}$  M) in dichloromethane.

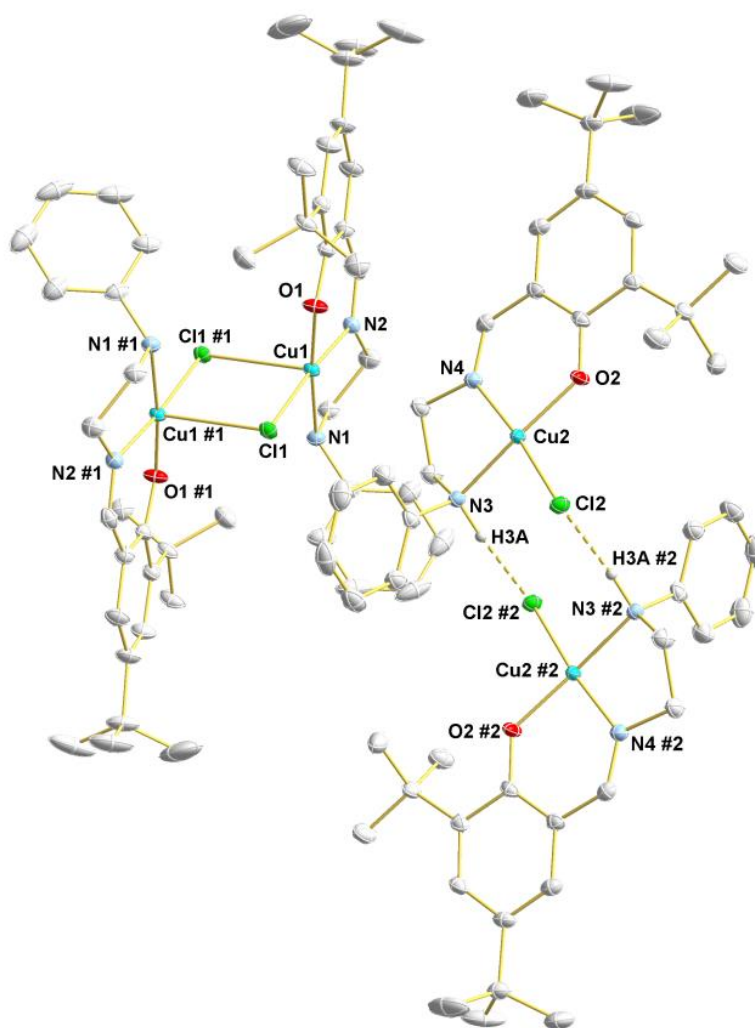

**Figure S10.** Intermolecular hydrogen bonds between two mononuclear species of complex 2a (thermal ellipsoids drawn at 60% probability level). For clarity the hydrogen atoms not-involved in the hydrogen bonds have been omitted. (N(3)-H(3A)⋯Cl(2)#2,  $d(\text{H}\cdots\text{A}) = 2.24 \text{ \AA}$ ,  $d(\text{D}\cdots\text{A}) = 3.2036(17) \text{ \AA}$ ,  $\angle(\text{D-H}\cdots\text{A}) = 160.2^\circ$  (#1 = 2- $x$ , 1- $y$ , 1- $z$ ; #2 = 1- $x$ , - $y$ , 1- $z$ ).

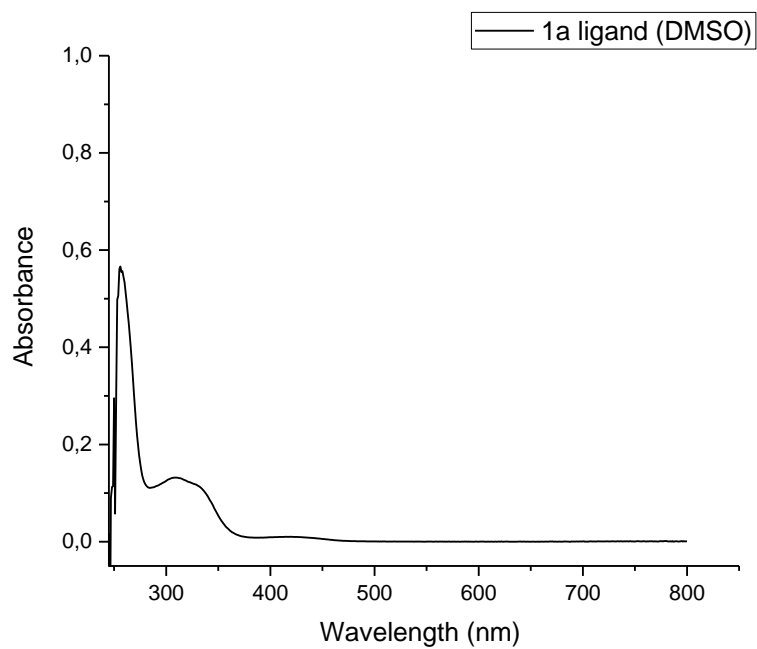

**Figure S11.** UV-Vis spectra of **1a** ( $1 \times 10^{-7}$  M) in DMSO (250 – 800 nm).

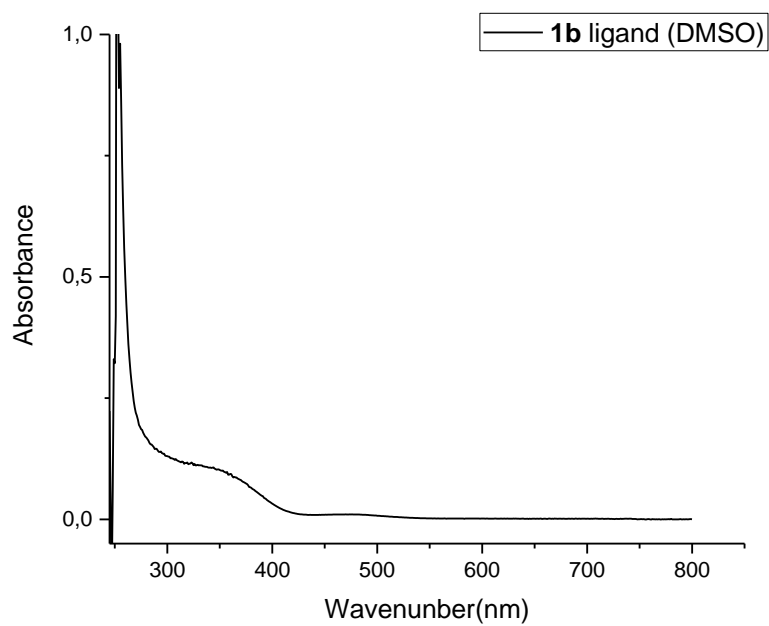

**Figure S12.** UV-Vis spectra of **1b** ( $1 \times 10^{-7}$  M) in DMSO (250 – 800 nm).

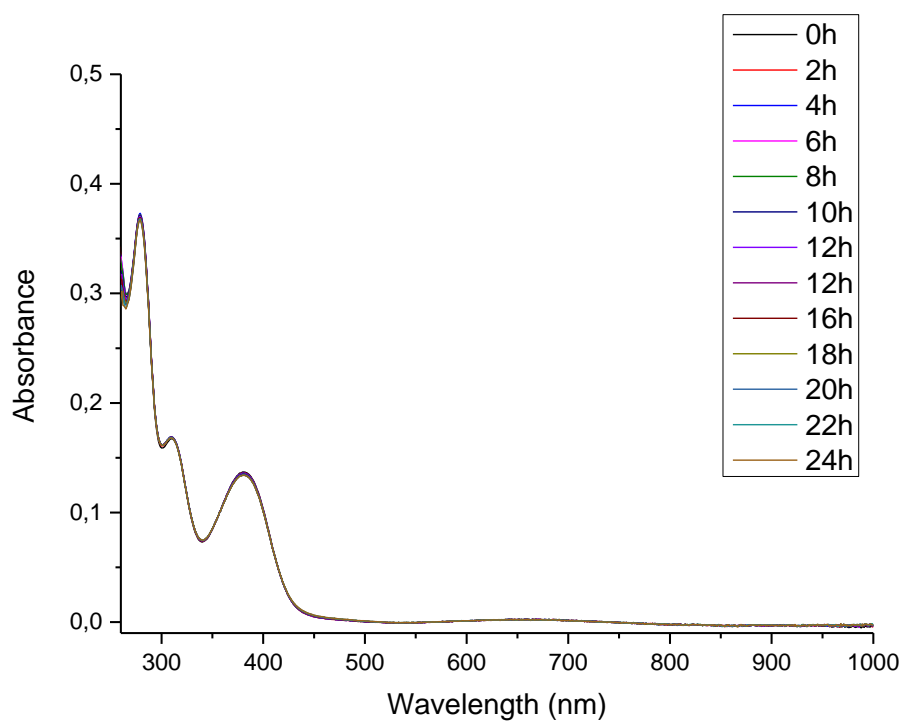

**Figure S13.** UV-Vis spectra of **2a** ( $1 \times 10^{-7}$  M) in DMSO (250 – 1000 nm).

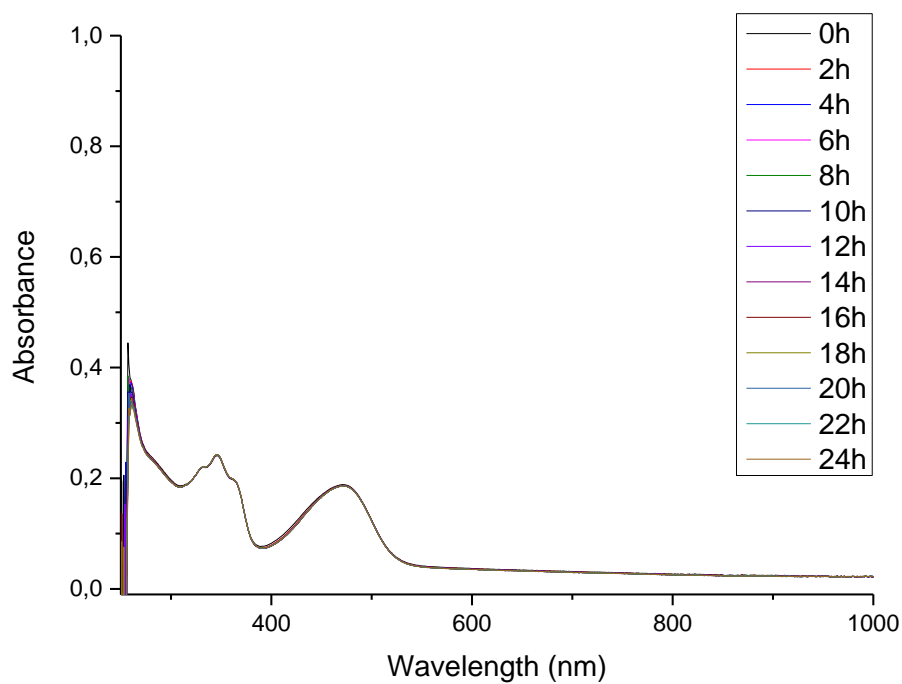

**Figure S14.** UV-Vis spectra of **2b** ( $1 \times 10^{-7}$  M) in DMSO (250 – 1000 nm).

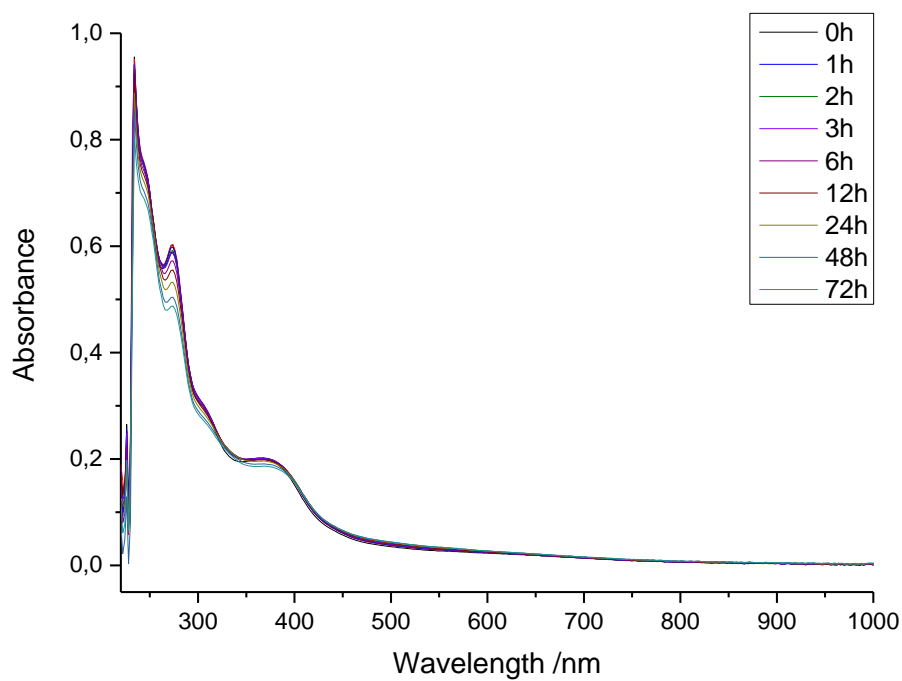

**Figure S15.** UV-Vis spectra of **2a** ( $1 \times 10^{-7}$  M) in H<sub>2</sub>O (250 – 1000 nm).

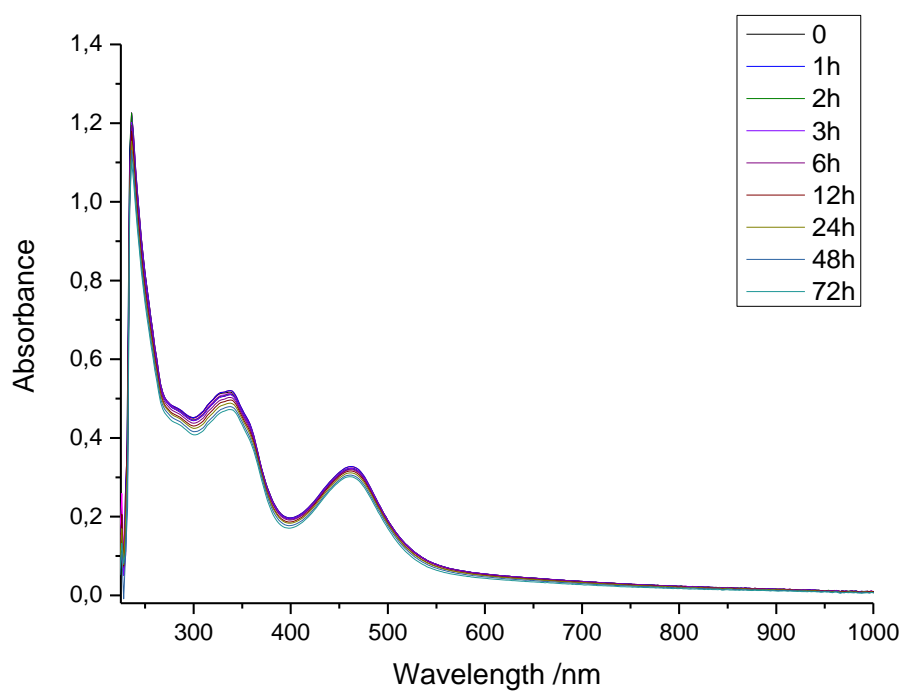

**Figure S16.** UV-Vis spectra of **2b** ( $1 \times 10^{-7}$  M) in  $\text{H}_2\text{O}$  (250 – 1000 nm).

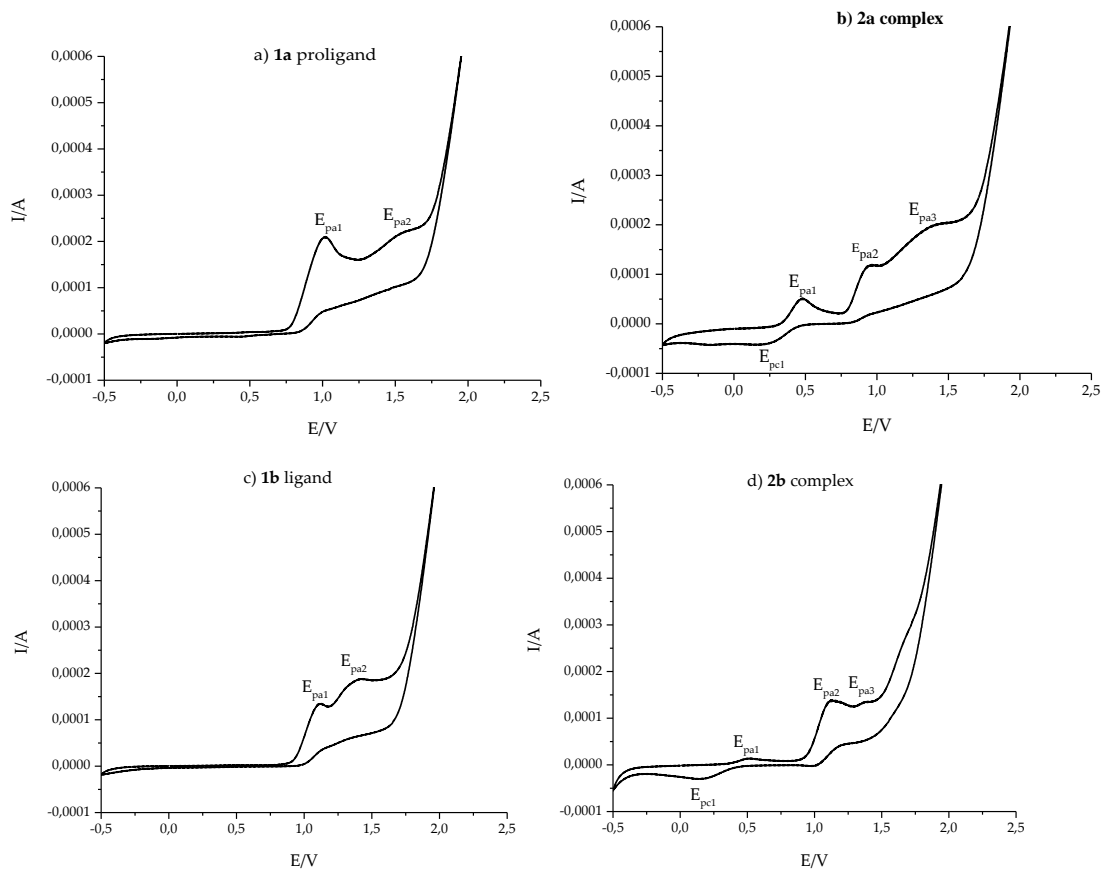

**Figure S17.** Cyclic voltammograms of ligands **1a-b** and Cu(II) complexes **2a-b**, in DMF solution at 100 mV/s scan rate, corresponding to the **1a** (a), **2a** (b), **1b** (c) and **2b** (d).

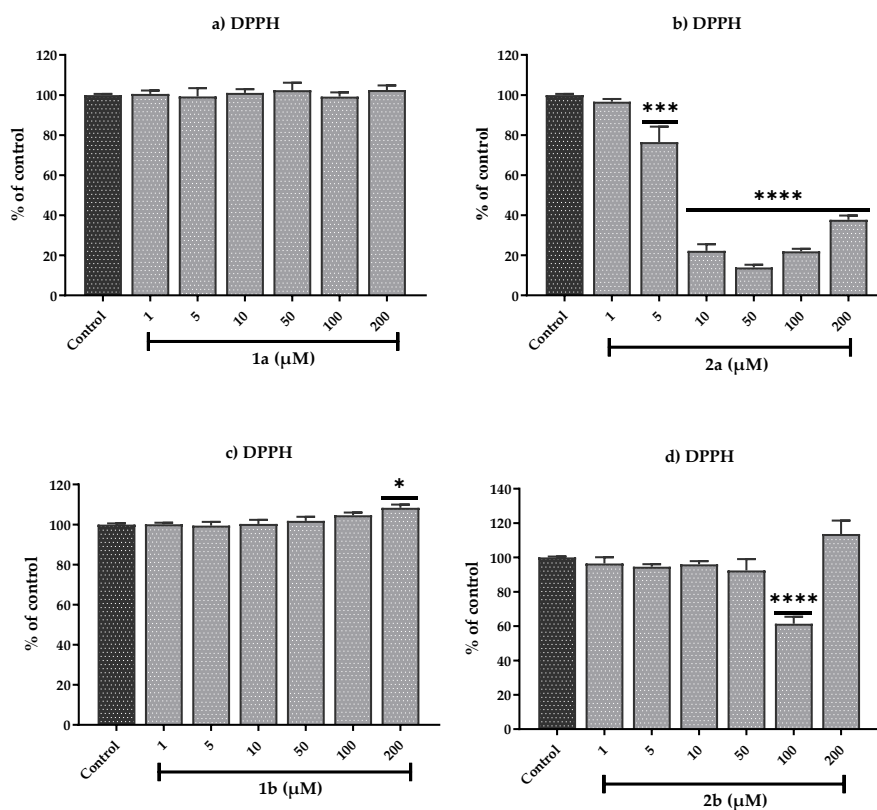

**Figure S18.** Effect of ligands and Cu(II) complexes represented by the **1a** (a), **2a** (b), **1b** (c), **2b** in different concentrations on DPPH radical-scavenger activity. Data are expressed as the mean  $\pm$  SEM for three independent experiments, carried out on different days. The results are calculated as % of control of the absorbance at 517 nm. Asterisk denotes significance levels when compared to control group: (\*)  $P < 0.05$ , (\*\*\*)  $P < 0.001$  and (\*\*\*\*)  $P < 0.0001$  (One-way ANOVA followed by the Newman-Keul's test).

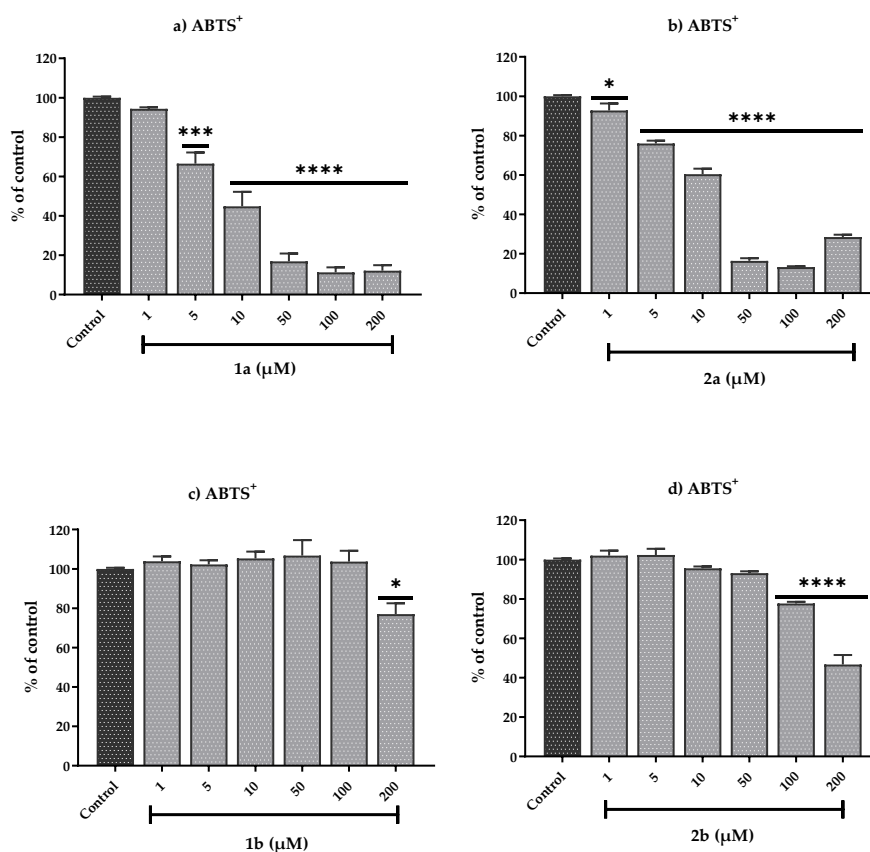

**Figure S19.** Effect of ligands and Cu(II) complexes represented by the **1a** (a), **2a** (b), **1b** (c), **2b** in different concentrations on ABTS<sup>+</sup> radical-scavenger activity. Data are expressed as the mean  $\pm$  SEM for three independent experiments, carried out on different days. The results are calculated as % of control of the absorbance at 730 nm. Asterisk denotes significance levels when compared to control group: (\*)  $P < 0.05$ , (\*\*\*)  $P < 0.001$  and (\*\*\*\*)  $P < 0.0001$  (One-way ANOVA followed by the Newman-Keul's test).



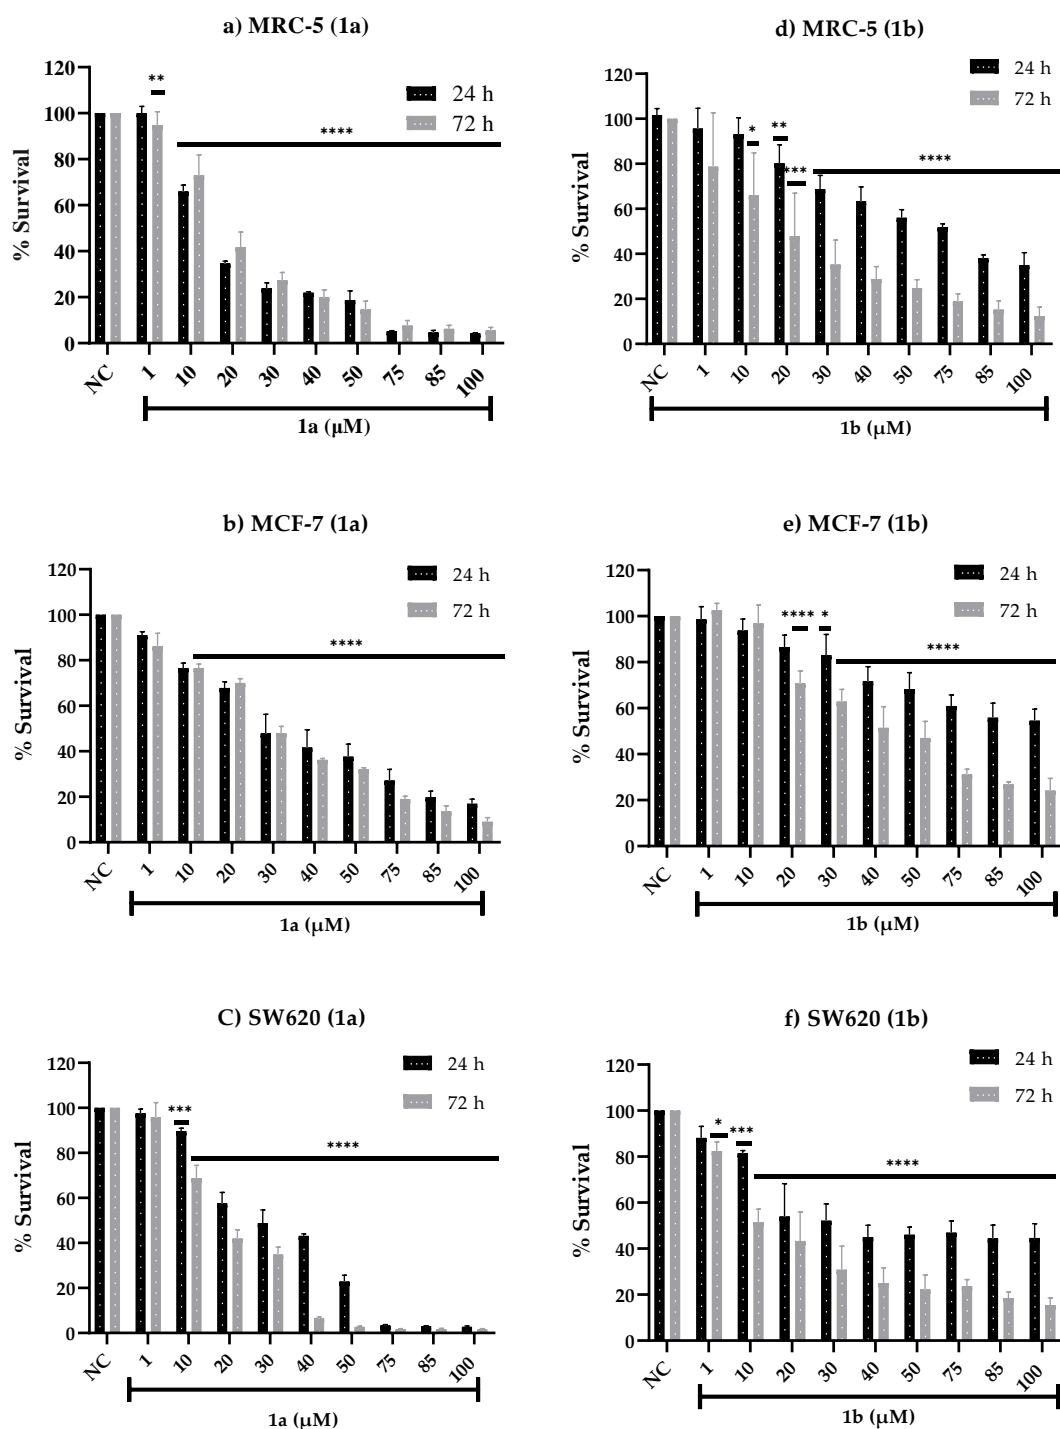

**Figure S20.** Comparison of the dose-response survival diagrams of MRC-5, MCF-7 and SW620 cell lines exposed to **1a** and **1b** free ligand (0 – 100  $\mu$ M) for 24 h or 72 h. The obtained values represent an average of at least three independent experiments. NC represents the negative control. Graphs represent the average  $\pm$  SD. Statistical analysis were performed using One-way ANOVA followed by

Dunnett's multiple comparison test and  $p < 0.05$  was considered as significant. \*  $p = 0.0189$  (d), 0.0145 (e), 0.0224 (f); \*\*  $p = 0.0027$  (a), 0.0015 (d); \*\*\*  $p = 0.0010$  (c) and (f), 0.0003 (d); \*\*\*\*  $p = < 0.0001$ .

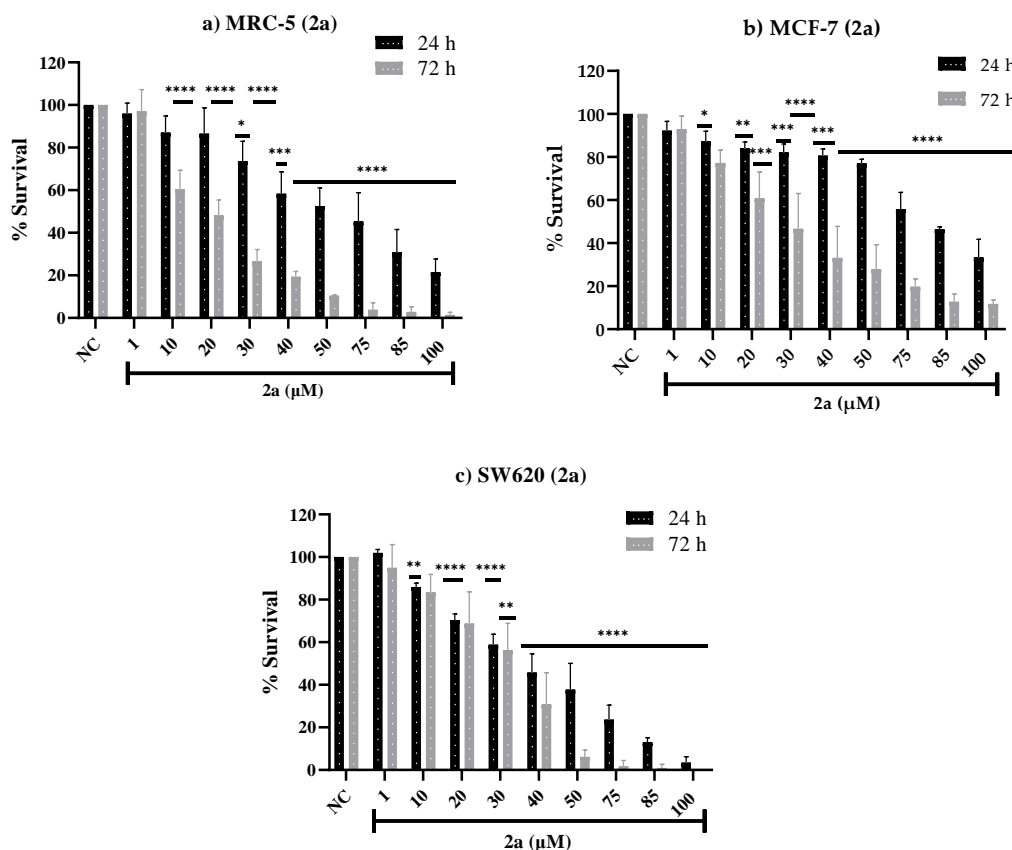

**Figure S21.** Comparison of the dose-response survival diagrams of MRC-5, MCF-7 and SW620 cell lines exposed to complex **2a** (0 – 100 μM) for 24 h and 72 h. The obtained values represent an average of at least three independent experiments. NC represents the negative control. Graphs represent the average  $\pm$  SD. Statistical analysis were performed using One-way ANOVA followed by Dunnett's multiple comparison test and  $p < 0.05$  was considered as significant. \*  $p = 0.0141$  (a); 0.0185 (24 h - b), 0.0445 (72 h -b), \*\*  $p = 0.0026$  (b), 0.0036 (24 h - c), 0.0017 (72 h - c) \*\*\*  $p = 0.0002$  (a); 0.0009 (24 h-b), 0.0004 (72 h -b), \*\*\*\*  $p = < 0.0001$ .

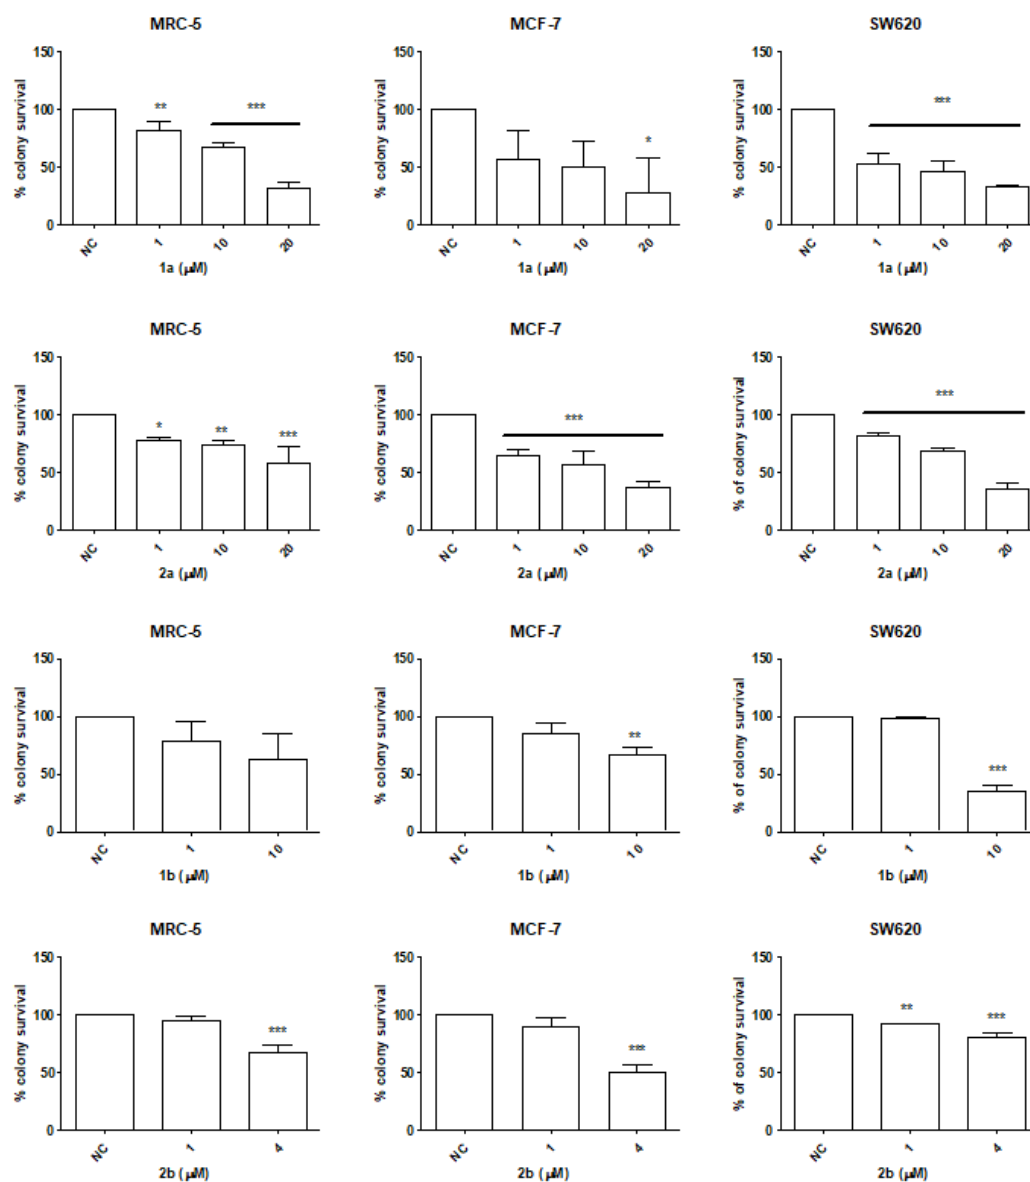

**Figure S22.** Colony Survival for **1a**, **1b**, **2a** and **2b** on MRC-5, MCF-7 and SW620. Data represent mean and SD of 3 independent experiments. One-way ANOVA and Dunnett1s posttest. (\*) $p < 0.05$ ; (\*\*)  $p < 0.01$ ; (\*\*\*)  $p < 0.001$ .

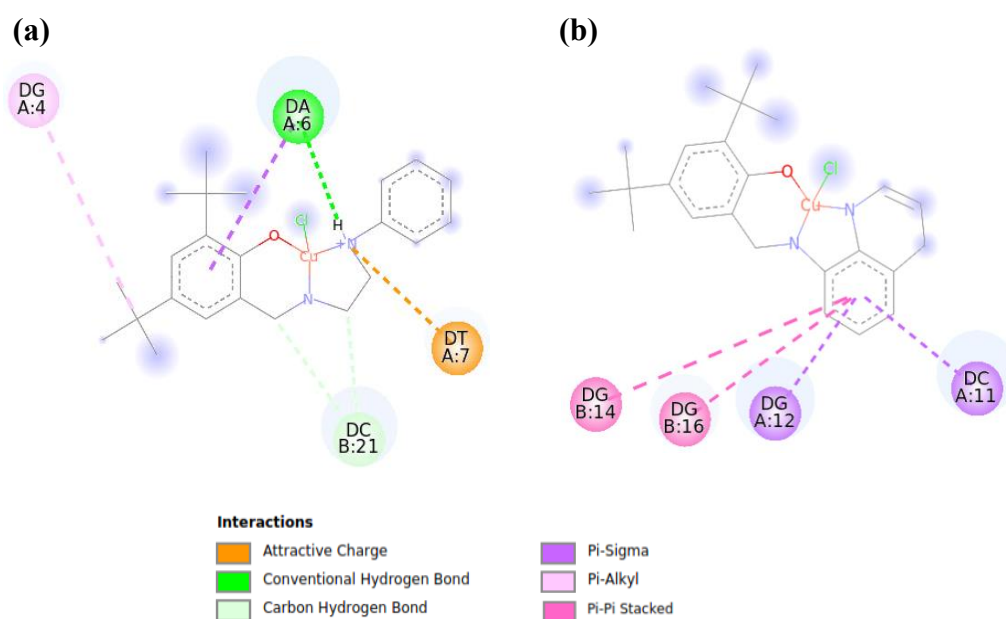

**Figure S23.** Two-dimensional interaction diagram of complexes **(a) 2a** and **(b) 2b** with DNA (PDB: 1BDNA).

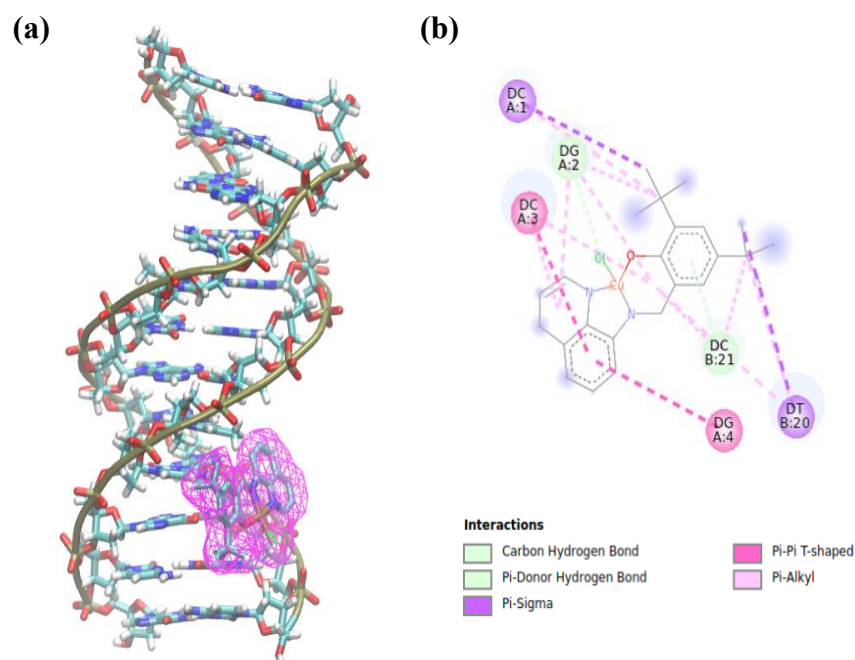

**Figure S24. (a)** An alternative docking pose for **2b** with an affinity value of  $-7.4$  kcal mol $^{-1}$ . **(b)** Two-dimensional interaction diagram of this mode with DNA.

**Table S1.** Crystallographic data and structure refinement parameters for **2a'**.

| Complex                                             | <b>2a'</b>                                                                                     |
|-----------------------------------------------------|------------------------------------------------------------------------------------------------|
| Empirical formula                                   | C <sub>92</sub> H <sub>124</sub> Cl <sub>4</sub> Cu <sub>4</sub> N <sub>8</sub> O <sub>4</sub> |
| Formula weight (g mol $^{-1}$ )                     | 1801.94                                                                                        |
| T (K)                                               | 111(2)                                                                                         |
| Crystal system                                      | Triclinic                                                                                      |
| Space group                                         | <i>P</i> -1                                                                                    |
| <i>a</i> (Å)                                        | 11.4946(5)                                                                                     |
| <i>b</i> (Å)                                        | 12.1360(5)                                                                                     |
| <i>c</i> (Å)                                        | 16.7973(7)                                                                                     |
|                                                     | 77.584(2)                                                                                      |
|                                                     | 87.932(2)                                                                                      |
|                                                     | 87.077(2)                                                                                      |
| <i>V</i> (Å <sup>3</sup> )                          | 2284.66(17)                                                                                    |
| <i>Z</i>                                            | 1                                                                                              |
| Radiation type                                      | Mo <i>K</i> α                                                                                  |
| <i>Q</i> <sub>calcd</sub> (g cm $^{-3}$ )           | 1.310                                                                                          |
| <i>μ</i> (mm $^{-1}$ )                              | 1.088                                                                                          |
| <i>F</i> (000)                                      | 948                                                                                            |
| Crystal size (mm)                                   | 0.14 × 0.09 × 0.06                                                                             |
| <i>θ</i> range (°)                                  | 2.327 to 30.686                                                                                |
| Limiting indices ( <i>h</i> , <i>k</i> , <i>l</i> ) | $-16 \leq h \leq 16$<br>$-17 \leq k \leq 17$<br>$-24 \leq l \leq 24$                           |
| Reflections collected                               | 77504                                                                                          |
| Reflections unique ( <i>R</i> <sub>int</sub> )      | 14148 (0.0787)                                                                                 |
| Completeness to <i>θ</i> <sub>max</sub> (%)         | 99.9                                                                                           |
| Data / restraints / param.                          | 14148 / 0 / 517                                                                                |

|                                                  |                   |
|--------------------------------------------------|-------------------|
| Absorption correction                            | Multiscan         |
| Min. and max. Transmission                       | 0.7080 and 0.7461 |
| R <sub>1</sub> [I > 2σ(I)]                       | 0.0440            |
| wR <sub>2</sub> [I > 2σ(I)]                      | 0.0804            |
| R <sub>1</sub> (all data)                        | 0.0843            |
| wR <sub>2</sub> (all data)                       | 0.0902            |
| S on F <sup>2</sup>                              | 1.011             |
| Largest diff. peak and hole (e Å <sup>-3</sup> ) | 0.614 and -0.558  |

**Table S2.** Selected geometrical properties of compounds **2a**, **2a'** and **2b** at the B3LYP/def2-TZVPP/def2-SVP level of theory. Distances are in angstroms and angles in degrees.

| Calculate value |       |       |       |
|-----------------|-------|-------|-------|
| Parameter       | 2a    | 2a'   | 2b    |
| Cu-O            | 1.904 | 1.954 | 1.923 |
| Cu-Cl           | 2.219 | 2.261 | 2.235 |
| Cu-N1           | 1.937 | 1.962 | 2.000 |
| Cu-X            | 2.109 | 2.162 | 2.062 |
| Cu-Cu           | -     | 3.417 | -     |
| Cu-Cl2          | -     | 2.959 | -     |
| N1-Cu-Cl        | 163.4 | 174.4 | 171.2 |
| X-Cu-O          | 169.6 | 175.2 | 169.4 |
| O-Cu-Cl         | 98.8  | 92.9  | 94.2  |
| X-Cu-Cl         | 88.1  | 91.9  | 94.6  |
| N1-Cu-X         | 82.8  | 83.8  | 81.1  |
| O-Cu-N1         | 92.2  | 91.4  | 90.9  |

**Coordinates xyz : Coordinates from ORCA-job 2a**

|    |                   |                   |                  |
|----|-------------------|-------------------|------------------|
| Cu | 6.42927785072474  | 3.34919281219363  | 6.26155145588961 |
| O  | 5.37803864012287  | 3.51217530414253  | 4.68240461520883 |
| Cl | 5.31985489493879  | 1.67369650160085  | 7.23939139736439 |
| N  | 7.88888188813128  | 3.16793670642029  | 7.76649587423149 |
| H  | 7.32664449521611  | 2.73934977925756  | 8.49607159581196 |
| N  | 7.35152785036804  | 5.05935965447030  | 5.91696650202245 |
| C  | 8.98139221043392  | 2.29197166969540  | 7.42812393099237 |
| C  | 9.54058361259485  | 2.32135389754930  | 6.14460348989118 |
| H  | 9.12776236535299  | 2.98743287630445  | 5.38517521094167 |
| C  | 10.59766742193177 | 1.46567337941395  | 5.82753812579071 |
| H  | 11.02550577660827 | 1.48844866669680  | 4.82258633710933 |
| C  | 11.08962013726641 | 0.56840588879838  | 6.77981645377514 |
| H  | 11.90951721948451 | -0.10688642596945 | 6.52496782307364 |
| C  | 10.51709010980218 | 0.52761278439325  | 8.05418215190476 |
| H  | 10.88522165933636 | -0.18092703297971 | 8.79989290873629 |
| C  | 9.46845022240524  | 1.39019245480596  | 8.38015187793015 |
| H  | 9.01536244460654  | 1.35955043540256  | 9.37435290893259 |
| C  | 8.24584011723752  | 4.56476269618001  | 8.10947584906661 |
| H  | 9.14332902228960  | 4.60652344349418  | 8.74841353062511 |
| H  | 7.39526341827295  | 4.97848877567808  | 8.67157994532786 |
| C  | 8.44949602069490  | 5.36608663237956  | 6.82792091957558 |
| H  | 8.49745993546515  | 6.44375967532965  | 7.05980556067396 |
| H  | 9.41179587229549  | 5.08790032233023  | 6.36497545266368 |
| C  | 7.04384404226819  | 5.88469667159453  | 4.96534487391082 |
| H  | 7.61182167685465  | 6.82797188856120  | 4.90353004210258 |
| C  | 6.03210957020111  | 5.71521419994138  | 3.97569871287226 |
| C  | 5.22705303838530  | 4.52566993589814  | 3.89099940974653 |

|   |                  |                  |                   |
|---|------------------|------------------|-------------------|
| C | 4.21050101489871 | 4.47406788331343 | 2.86482932854206  |
| C | 4.08860032813358 | 5.55978007009354 | 2.01369013679644  |
| H | 3.32349935204435 | 5.51500134994000 | 1.24049112139063  |
| C | 4.88582315587218 | 6.73753347782381 | 2.07003654211784  |
| C | 5.84283313438268 | 6.78777655292767 | 3.05845067163693  |
| H | 6.48791303104384 | 7.66096154041005 | 3.16925923610111  |
| C | 3.29982951727676 | 3.23957105428753 | 2.74300083546199  |
| C | 2.27433284818610 | 3.40144030994290 | 1.60723618211704  |
| H | 2.75733902441419 | 3.51562730648100 | 0.62346042616934  |
| H | 1.61133405700612 | 4.26622421679429 | 1.76930897598564  |
| H | 1.63983795620931 | 2.50306620090403 | 1.56063849932099  |
| C | 4.15090486245100 | 1.98766996175989 | 2.43236412870618  |
| H | 3.49625841877244 | 1.10822949716343 | 2.31730114153964  |
| H | 4.86655533325910 | 1.77980917853508 | 3.23769751550547  |
| H | 4.70741636565743 | 2.12228151204643 | 1.49016043659348  |
| C | 2.51504715032636 | 3.03148532765298 | 4.05859546891291  |
| H | 1.89913283050086 | 3.91746832328389 | 4.28479218274939  |
| H | 3.18617411499136 | 2.84265298506869 | 4.90560141670408  |
| H | 1.83851850787583 | 2.16701564881317 | 3.95692553750223  |
| C | 4.64347491251293 | 7.86416593313821 | 1.05622224105726  |
| C | 4.85409024441176 | 7.32120361719270 | -0.37378964338876 |
| H | 4.68024329140262 | 8.11526588259184 | -1.11882777217099 |
| H | 4.16422330880006 | 6.49447037962817 | -0.60144519501813 |
| H | 5.88178873986967 | 6.94618746889469 | -0.50301118456007 |
| C | 3.19656661955099 | 8.38370724239666 | 1.19802498774587  |
| H | 3.00244987303752 | 9.18990323477469 | 0.47125738327080  |
| H | 3.02106258687796 | 8.78233314126339 | 2.20976389163321  |



|   |                  |                  |                  |
|---|------------------|------------------|------------------|
| H | 2.45738127284263 | 7.58825974921757 | 1.01814649036440 |
| C | 5.60299321481215 | 9.04476401594033 | 1.27061869571163 |
| H | 6.65551984096369 | 8.73988304782376 | 1.15916895720259 |
| H | 5.47924411919238 | 9.49561002178494 | 2.26793470467289 |
| H | 5.40399945913284 | 9.83037027452752 | 0.52477970345374 |

### Coordinates from ORCA-job 2a'

|    |                   |                   |                   |
|----|-------------------|-------------------|-------------------|
| Cu | 10.43465165283363 | 7.72443878369060  | 7.87480873110712  |
| O  | 10.46934505414110 | 7.64204537952991  | 5.92286193237510  |
| N  | 10.30331607811301 | 7.96948435581608  | 10.01866883196358 |
| H  | 11.30547997665298 | 8.05390016234102  | 10.17127335230819 |
| Cl | 11.74222640787630 | 5.89207070474505  | 8.09005927162183  |
| C  | 9.79242933746797  | 6.85595643679011  | 10.74341724108252 |
| N  | 9.20042094694973  | 9.24949505712336  | 7.83794981931180  |
| C  | 8.41779399081223  | 6.68743258602720  | 10.96448401392852 |
| H  | 7.70000304447882  | 7.41321693576422  | 10.58400872881750 |
| C  | 7.95524258253351  | 5.57640967581781  | 11.67363316729596 |
| H  | 6.88171332297797  | 5.45758592647420  | 11.83990904162293 |
| C  | 8.85165986360905  | 4.62381651529686  | 12.16502988561267 |
| H  | 8.48533191469536  | 3.75633653854877  | 12.71880007317175 |
| C  | 10.22163803840571 | 4.79233753182995  | 11.93984954367101 |
| H  | 10.93989849158612 | 4.06208270342929  | 12.31723727032841 |
| C  | 10.69178918474088 | 5.89677642231889  | 11.23375672230019 |
| H  | 11.75782452254933 | 6.01804910820786  | 11.05779529355457 |
| C  | 9.66076920910438  | 9.29073340347329  | 10.21408282321649 |
| H  | 10.46099469873845 | 10.03585621473906 | 10.14149301037518 |
| H  | 9.20866702247339  | 9.34928403539009  | 11.21584349514592 |

|   |                   |                   |                  |
|---|-------------------|-------------------|------------------|
| C | 8.62621342452340  | 9.57892624714562  | 9.12950849906117 |
| H | 7.72218870527822  | 8.96567896861147  | 9.27541297761618 |
| H | 8.31954268159097  | 10.63892526109815 | 9.17885420653413 |
| C | 9.15734288713332  | 10.07840327094894 | 6.85654177345167 |
| H | 8.66852838617756  | 11.05249727639400 | 7.02961201241230 |
| C | 9.65603132370584  | 9.87010521195645  | 5.52716369172593 |
| C | 10.33329922143805 | 9.55573489545241  | 2.86648583900816 |
| H | 10.57224303784928 | 9.43565078915100  | 1.81121712554317 |
| C | 10.47515409307211 | 8.45008265146111  | 3.69244554903803 |
| C | 10.20628841195109 | 8.61536364330337  | 5.10216742226675 |
| C | 9.89062424767634  | 10.83467395329260 | 3.29034320965460 |
| C | 9.52953688861286  | 10.95117937089058 | 4.61774960576319 |
| H | 9.13087356621972  | 11.88840125699040 | 5.00884497900562 |
| C | 10.85881362843363 | 7.06881883413091  | 3.13047692445287 |
| C | 12.15975549240363 | 6.54411427488402  | 3.77121039406956 |
| H | 12.45399312111749 | 5.59258457620546  | 3.29882594248416 |
| H | 12.01220377886979 | 6.35940374770301  | 4.84138366677536 |
| H | 12.98260616280003 | 7.26258211271377  | 3.63204839839710 |
| C | 9.70973356113215  | 6.07732466815860  | 3.42242189458599 |
| H | 8.77699534815833  | 6.41165583570555  | 2.94045075523132 |
| H | 9.53333098052036  | 5.98470152542046  | 4.50245872108915 |
| H | 9.96006478998405  | 5.07907708613653  | 3.02652760958949 |
| C | 11.07468148440051 | 7.11158673892870  | 1.60799601278315 |
| H | 10.17121213171690 | 7.43938024736764  | 1.07058646541654 |
| H | 11.32553339204883 | 6.10205389068588  | 1.24722753754760 |
| H | 11.90493579773042 | 7.77959948654336  | 1.32831133973206 |
| C | 9.79728723557653  | 11.98184778019748 | 2.27480731971581 |

|    |                   |                   |                   |
|----|-------------------|-------------------|-------------------|
| C  | 8.83436438899564  | 11.58441606579163 | 1.13520969198527  |
| H  | 8.74975316012200  | 12.39912404729559 | 0.39708245194823  |
| H  | 7.82858407539300  | 11.37172474420615 | 1.53079308774696  |
| H  | 9.18197844946543  | 10.68630965106551 | 0.60233711542097  |
| C  | 11.19619851230450 | 12.26384788961314 | 1.68655891198396  |
| H  | 11.62424040909364 | 11.37218317176925 | 1.20367052568696  |
| H  | 11.89459350630463 | 12.58397306272383 | 2.47563283521790  |
| H  | 11.14543330432712 | 13.06474507967311 | 0.93046437289592  |
| C  | 9.27581302933289  | 13.27491447869224 | 2.91973605792016  |
| H  | 9.23370905881590  | 14.07910065937242 | 2.16848731262676  |
| H  | 9.93189400299473  | 13.61544727341165 | 3.73627919325433  |
| H  | 8.26027720454690  | 13.14644928459320 | 3.32606469560370  |
| Cu | 13.77976776397461 | 7.98120986452543  | 8.52427744292796  |
| O  | 13.74499091548372 | 8.06355675152856  | 10.47624690534671 |
| N  | 13.91117621240375 | 7.73618140373525  | 6.38038136967057  |
| H  | 12.90901854912799 | 7.65171665048832  | 6.22777907784875  |
| Cl | 12.47226949992673 | 9.81360478975128  | 8.30897643243940  |
| C  | 14.42202067725026 | 8.84972155391136  | 5.65562823263368  |
| N  | 15.01405873916921 | 6.45620843639089  | 8.56114448347256  |
| C  | 15.79664909465609 | 9.01829646283023  | 5.43455511142808  |
| H  | 16.51446868702221 | 8.29254265799702  | 5.81503525505140  |
| C  | 16.25915572026303 | 10.12932969062000 | 4.72539276645857  |
| H  | 17.33268016009839 | 10.24819137622248 | 4.55911223276898  |
| C  | 15.36270135518074 | 11.08188136414985 | 4.23398333178205  |
| H  | 15.72899415670359 | 11.94936735804204 | 3.68019925166406  |
| C  | 13.99272974700452 | 10.91330777300864 | 4.45916516278507  |
| H  | 13.27443807950637 | 11.64352555465819 | 4.08176333618692  |

|   |                   |                   |                   |
|---|-------------------|-------------------|-------------------|
| C | 13.52262407900030 | 9.80886076011430  | 5.16527483720171  |
| H | 12.45659340145221 | 9.68754858799568  | 5.34122952799783  |
| C | 14.55378761219148 | 6.41496220638805  | 6.18499742363074  |
| H | 13.75359533026540 | 5.66980239691471  | 6.25756530185474  |
| H | 15.00592217139553 | 6.35642204633768  | 5.18325058946525  |
| C | 15.58832849308134 | 6.12682747494576  | 7.26960008454309  |
| H | 16.49231551893693 | 6.74013796132542  | 7.12372895030625  |
| H | 15.89507057847287 | 5.06684899085571  | 7.22025523909458  |
| C | 15.05712143035757 | 5.62726961977935  | 9.54252798641226  |
| H | 15.54596443310263 | 4.65319212195922  | 9.36944524915846  |
| C | 14.55836005194985 | 5.83550586318653  | 10.87188720605234 |
| C | 13.88070185301932 | 6.14966787408342  | 13.53249206236074 |
| H | 13.64160278007102 | 6.26966943755615  | 14.58773514831830 |
| C | 13.73910484275968 | 7.25541986738192  | 12.70662104613791 |
| C | 14.00811148909471 | 7.09023776122826  | 11.29691908936957 |
| C | 14.32340571845401 | 4.87075254524154  | 13.10859265318957 |
| C | 14.68471081862833 | 4.75435748810573  | 11.78123409754416 |
| H | 15.08338605271634 | 3.81715155453353  | 11.39011289293862 |
| C | 13.35540729092908 | 8.63665249420471  | 13.26863523089579 |
| C | 12.05501515234178 | 9.16175855172504  | 12.62712241525665 |
| H | 11.76064189326627 | 10.11324464204137 | 13.09950775034625 |
| H | 12.20336697262172 | 9.34668120458224  | 11.55709456378720 |
| H | 11.23191529505544 | 8.44342636834124  | 12.76553271056880 |
| C | 14.50488885651513 | 9.62797479731585  | 12.97766837131574 |
| H | 15.43723753370595 | 9.29334639296367  | 13.46018766910503 |
| H | 14.68202787178454 | 9.72080251037297  | 11.89777493945452 |
| H | 14.25450109947601 | 10.62618645465298 | 13.37361940138731 |

|   |                   |                  |                   |
|---|-------------------|------------------|-------------------|
| C | 13.13853530223132 | 8.59361523197141 | 14.79096547989562 |
| H | 14.04156755511071 | 8.26546111152236 | 15.32889092475046 |
| H | 12.88771798253762 | 9.60313777485758 | 15.15178692960825 |
| H | 12.30791926103346 | 7.92576820799152 | 15.06996818177773 |
| C | 14.41653019594876 | 3.72348050274844 | 14.12403684630939 |
| C | 15.37920606926862 | 4.12079937927183 | 15.26388166676807 |
| H | 15.46366430304058 | 3.30601476765755 | 16.00194148257876 |
| H | 16.38506955753893 | 4.33353870245292 | 14.86853565973144 |
| H | 15.03147258250653 | 5.01884731298736 | 15.79677463329066 |
| C | 13.01749121748567 | 3.44142160437223 | 14.71195521254297 |
| H | 12.58933371504668 | 4.33304729924867 | 15.19481349478688 |
| H | 12.31927764794868 | 3.12134774113858 | 13.92270045287139 |
| H | 13.06809502292465 | 2.64046697919532 | 15.46800003355532 |
| C | 14.93814564671746 | 2.43047758102100 | 13.47909378044248 |
| H | 14.98010308844023 | 1.62622103028823 | 14.23027530547268 |
| H | 14.28223259766531 | 2.09001580479760 | 12.66238637635128 |
| H | 15.95376205357689 | 2.55899181944360 | 13.07298233505245 |

### **Coordinates from ORCA-job 2b**

|   |                  |                  |                  |
|---|------------------|------------------|------------------|
| C | 3.98553773990649 | 6.66302105229965 | 1.23463602050195 |
| C | 5.38327466526945 | 6.80396263000328 | 1.22218671122103 |
| C | 3.19815729011710 | 7.78119750510912 | 1.23952938981237 |
| H | 3.55367588559393 | 5.67096324738992 | 1.24580298524992 |
| N | 5.96210211048391 | 7.98125637956060 | 1.20388141875383 |
| H | 6.06074494623846 | 5.95544934958883 | 1.22957676715870 |
| C | 3.79294542109280 | 9.05807288205004 | 1.22169472078716 |
| H | 2.11637710503687 | 7.70127529689300 | 1.25846559767834 |

|    |                   |                   |                   |
|----|-------------------|-------------------|-------------------|
| C  | 5.20392293243370  | 9.10496026982697  | 1.19436918443910  |
| C  | 3.06709429820248  | 10.26732029573773 | 1.23260099024928  |
| C  | 5.89045564415590  | 10.34516238081256 | 1.15542949886932  |
| C  | 3.74195752141210  | 11.45856498816616 | 1.22211004195239  |
| H  | 1.98416122655670  | 10.23942752215003 | 1.26063213152278  |
| C  | 5.14490289253038  | 11.50528754441293 | 1.18770647369919  |
| H  | 3.18970355200002  | 12.39056565843129 | 1.24746750336903  |
| H  | 5.63089640636212  | 12.47191723646744 | 1.20003307158971  |
| N  | 7.27562300809065  | 10.23577207150709 | 1.10320426574922  |
| C  | 8.02181525406793  | 11.27461916806792 | 0.84741291874034  |
| Cu | 7.96915488908284  | 8.38570556746848  | 1.23757267780680  |
| O  | 9.76833168484542  | 9.03651884935333  | 1.38467638214298  |
| Cl | 8.58276831088914  | 6.25269634747506  | 1.21748178005582  |
| C  | 9.42109379422556  | 11.32243549585911 | 0.80210392763049  |
| H  | 7.52326343494743  | 12.21854589112523 | 0.62105214645677  |
| C  | 10.24359577259055 | 10.19426220876209 | 1.12338640794372  |
| C  | 11.66597691145564 | 10.41133416844828 | 1.14653065351856  |
| C  | 12.14211888205153 | 11.63114617563511 | 0.73673448530945  |
| C  | 9.99574541071862  | 12.55578674089626 | 0.40514297082043  |
| C  | 11.34404467688048 | 12.72699565763078 | 0.32367288577803  |
| H  | 13.21526050872356 | 11.76634342156093 | 0.72423185388723  |
| H  | 9.31537852526167  | 13.35589605061243 | 0.13614352156063  |
| C  | 11.99094461927697 | 13.97004166368386 | -0.27201445190710 |
| C  | 11.00533641950721 | 15.13273002031553 | -0.36274594957050 |
| C  | 12.46562483281251 | 13.61745727898008 | -1.68823979765462 |
| C  | 13.19221519747244 | 14.43074891385153 | 0.55493351561377  |
| C  | 12.60757932120909 | 9.28677399820755  | 1.55969961675383  |

|   |                   |                   |                   |
|---|-------------------|-------------------|-------------------|
| C | 12.51193190179040 | 8.15136682847341  | 0.53237139127803  |
| C | 12.25860012325396 | 8.78100710926371  | 2.96570583272261  |
| C | 14.06161142624361 | 9.74924541947291  | 1.60693690457731  |
| H | 11.23926704118700 | 8.40509302945405  | 3.02238560737708  |
| H | 12.38666409444008 | 9.58284139581382  | 3.69849017009370  |
| H | 12.93616522041993 | 7.96759394784553  | 3.23765963248603  |
| H | 11.50770856333329 | 7.73265511630527  | 0.48717910300203  |
| H | 13.20745896506827 | 7.35050123075180  | 0.79711402202433  |
| H | 12.78565073592830 | 8.52335706045805  | -0.45913783081651 |
| H | 10.16784134897535 | 14.90784818612187 | -1.02720373455626 |
| H | 11.50977242781732 | 16.01280976755395 | -0.76854119582348 |
| H | 10.60274105191760 | 15.39448383565105 | 0.61943898476211  |
| H | 11.62719385233265 | 13.28230862169517 | -2.30339815755956 |
| H | 13.20479016389788 | 12.81305581713133 | -1.66807522367061 |
| H | 12.92614251723201 | 14.48717110230930 | -2.16620532638066 |
| H | 12.89292399728100 | 14.69188061976857 | 1.57316213016543  |
| H | 13.64095929456844 | 15.31533661998144 | 0.09524705119500  |
| H | 13.96923976709117 | 13.66704482586151 | 0.61201209567690  |
| H | 14.43513547019600 | 10.04828546879464 | 0.62388976115731  |
| H | 14.68253379553478 | 8.92157031431120  | 1.95661177943085  |
| H | 14.20421114998920 | 10.58141875464114 | 2.30159468536842  |

**Coordinates from ORCA-job 1a**

|   |                   |                   |                   |
|---|-------------------|-------------------|-------------------|
| C | -5.76873542475317 | -3.01600485810156 | -0.55615197992032 |
| C | -5.07865064961583 | -2.03396438797473 | -1.27826845096544 |
| C | -5.13166498658434 | -4.19068782856504 | -0.16760537183593 |
| C | -3.77794610208207 | -4.41939511750174 | -0.49302011733659 |

|   |                   |                    |                   |
|---|-------------------|--------------------|-------------------|
| C | -3.74069935664138 | -2.25711932957272  | -1.60731011753029 |
| C | -3.09060377809309 | -3.43558684976981  | -1.22915722756585 |
| N | -3.15884557788085 | -5.58365363660585  | -0.05406140685152 |
| H | -5.67680607980246 | -4.94738471158812  | 0.40474327250354  |
| H | -3.18570375542786 | -1.50555692527880  | -2.17537697262406 |
| H | -2.04712830644209 | -3.58394760538480  | -1.50840553429700 |
| H | -6.81813963211316 | -2.86355985388598  | -0.28970861936217 |
| H | -5.57981214855101 | -1.11193804867564  | -1.58068225665684 |
| C | -1.86967972361405 | -6.00457053044944  | -0.55670630783278 |
| C | -1.43361939373650 | -7.30113704045261  | 0.12470717799750  |
| H | -1.11816728807566 | -5.22926480749641  | -0.33706535651882 |
| H | -1.86970447074520 | -6.14671841527182  | -1.65697082612437 |
| N | -0.11050278617286 | -7.67952078452965  | -0.31428356469591 |
| H | -2.17284112157728 | -8.10487402170485  | -0.07506738361360 |
| H | -1.41354795758161 | -7.13181871305537  | 1.21544919445920  |
| H | -3.79585666651217 | -6.33274105339922  | 0.16851962974165  |
| C | 0.09381827241168  | -8.83296289019925  | -0.83000248889891 |
| C | 1.39528927042546  | -9.27394348048732  | -1.30552706772342 |
| H | -0.73751497066890 | -9.55597777637455  | -0.93709988693530 |
| C | 1.52156674052089  | -10.57148262000562 | -1.84137901898776 |
| C | 2.52441027438987  | -8.41592880224982  | -1.24156332326088 |
| C | 3.78119540925302  | -8.86191797726668  | -1.73040968130110 |
| C | 3.83583404904978  | -10.15791703695106 | -2.24615059682170 |
| C | 2.73761406504418  | -11.04235383484329 | -2.31640960324860 |
| C | 5.02249707061735  | -7.95138204546916  | -1.69158635241013 |
| C | 4.75937188652548  | -6.67429363421922  | -2.52137945227804 |
| H | 5.65328429644768  | -6.02896755086223  | -2.51337152860594 |



|   |                  |                    |                   |
|---|------------------|--------------------|-------------------|
| H | 3.91555273538117 | -6.09851942272574  | -2.12141669124465 |
| H | 4.53755355670429 | -6.93335349012346  | -3.56931745656186 |
| C | 6.25948792840200 | -8.64650514175486  | -2.28599843813859 |
| H | 6.11300383747849 | -8.92028244784690  | -3.34272221966337 |
| H | 6.53285953542827 | -9.55581572455806  | -1.72776952178121 |
| H | 7.11905767623236 | -7.96027419971329  | -2.23841440995186 |
| C | 5.35262121858284 | -7.57777594769979  | -0.22909131598848 |
| H | 4.52803158105994 | -7.03148804267364  | 0.24568677868524  |
| H | 6.25287474802874 | -6.94213533023870  | -0.19661208962132 |
| H | 5.55578190875217 | -8.48388449427531  | 0.36428800295902  |
| C | 2.93123813791773 | -12.45034654889365 | -2.89886246041705 |
| C | 1.62375754498788 | -13.25760461323949 | -2.89491680013267 |
| H | 1.23109320942800 | -13.39235784211609 | -1.87480591996247 |
| H | 1.80122159009025 | -14.25897221505633 | -3.31734516038920 |
| H | 0.84334525130850 | -12.77392181628267 | -3.50317803374388 |
| C | 3.42944702757836 | -12.34043661518122 | -4.35583715559968 |
| H | 2.69713738071484 | -11.80482379758532 | -4.98051816461021 |
| H | 3.58388743882321 | -13.34272325220607 | -4.78824405358163 |
| H | 4.38502382333903 | -11.79817326086303 | -4.42000970796389 |
| C | 3.97440084009109 | -13.21432008375234 | -2.05539918246493 |
| H | 4.94803994937678 | -12.70098190969012 | -2.04724666379266 |
| H | 4.13347024887755 | -14.22692125784523 | -2.46143431473032 |
| H | 3.63778783105433 | -13.31156384556157 | -1.01103518749622 |
| O | 2.40150828593327 | -7.18103049737498  | -0.72104813112551 |
| H | 1.44515362511627 | -7.06800085479972  | -0.43748313676966 |
| H | 0.62752367168914 | -11.19603966842292 | -1.86864514313905 |
| H | 4.79293825960961 | -10.51508551132678 | -2.62125220327241 |

### Coordinates from ORCA-job 1b

|   |                   |                   |                   |
|---|-------------------|-------------------|-------------------|
| C | -1.51126892104837 | -1.71536217644799 | 0.06007084592919  |
| C | -0.96607743666408 | -0.44746220420035 | 0.06482917412502  |
| C | 0.43159471747571  | -0.26435255144964 | 0.01762858540136  |
| C | -0.66256180768569 | -2.85136756034290 | 0.01119464166954  |
| C | 0.76318774577102  | -2.68563827469513 | -0.00694766703349 |
| C | 1.30493770513417  | -1.34429132643233 | 0.00401133267488  |
| C | -1.16977730623653 | -4.17840311963205 | -0.01399364359395 |
| N | 1.59776940028339  | -3.76525939502895 | -0.05998999118927 |
| C | -0.30131970259754 | -5.24377126633774 | -0.06312552440155 |
| C | 1.08882914601556  | -4.97694060254436 | -0.09178083438492 |
| N | 2.67725744632446  | -1.14263427328488 | -0.12503970434531 |
| C | 3.46183689189777  | -1.83401924330526 | 0.60143329411758  |
| C | 4.89983046962942  | -1.98937225346698 | 0.35330911860178  |
| C | 5.77059914971497  | -0.91180568379629 | 0.14500368742550  |
| C | 7.13366115949083  | -1.13318286092396 | -0.04346419755304 |
| C | 7.57953659321901  | -2.46925486735998 | -0.02761446492605 |
| C | 5.36774398071226  | -3.31714152612199 | 0.31056212546311  |
| C | 6.74627179903172  | -3.58189729065572 | 0.13515111299511  |
| C | 7.29612126332579  | -5.01956950073973 | 0.10394136447126  |
| C | 6.68962305751876  | -5.78579751984904 | -1.09317764001037 |
| H | 5.59604330497646  | -5.84309799475630 | -1.02413861406462 |
| H | 7.08957962569811  | -6.81292067188988 | -1.12487272267753 |
| H | 6.95144655441288  | -5.28988803579371 | -2.04161660804983 |
| C | 8.82617671214484  | -5.04483066191218 | -0.05522218334018 |
| H | 9.15098256840552  | -4.58343697088078 | -1.00072934850980 |

|   |                   |                   |                   |
|---|-------------------|-------------------|-------------------|
| H | 9.17314440702594  | -6.08981666048611 | -0.06139365446631 |
| H | 9.33687807622345  | -4.53026796509250 | 0.77383500175058  |
| C | 6.95097639717442  | -5.74003704705775 | 1.42621221543906  |
| H | 5.86669169386601  | -5.79689354543463 | 1.58553489164470  |
| H | 7.39954658898759  | -5.21133027864559 | 2.28274153437669  |
| H | 7.35283059184869  | -6.76665448713425 | 1.41268986056788  |
| C | 8.14729409907312  | 0.00180225841088  | -0.25875077572455 |
| C | 7.47479583003611  | 1.38317834548802  | -0.23371323365363 |
| H | 6.71623598075229  | 1.48201918171741  | -1.02569465400386 |
| H | 8.22914741934066  | 2.16951818492991  | -0.39430017995531 |
| H | 6.98766580184048  | 1.58172350380266  | 0.73377269925890  |
| C | 8.83297494067217  | -0.17906460845630 | -1.62993818877689 |
| H | 8.09096529772950  | -0.15461139082173 | -2.44357433121568 |
| H | 9.36947692572636  | -1.13807141150063 | -1.69475104482545 |
| H | 9.56490531313375  | 0.62654805546111  | -1.80677183072164 |
| C | 9.21128782809747  | -0.04084911940203 | 0.85841475246003  |
| H | 8.74403433415822  | 0.08494130625098  | 1.84801616362205  |
| H | 9.95044042689659  | 0.76595481991225  | 0.72170851762987  |
| H | 9.75702650570513  | -0.99663462198422 | 0.86492111371703  |
| H | 5.34627095455856  | 0.09128912548787  | 0.15808254289298  |
| H | 8.64406440983560  | -2.64686739687003 | -0.16552880602504 |
| H | 3.06468234368940  | -2.44194532186172 | 1.43179968156867  |
| H | -2.25215719933334 | -4.33260413825986 | 0.00296709772511  |
| H | -0.65917525824524 | -6.27482591856575 | -0.08621827554607 |
| H | 1.80440408634190  | -5.80504236850070 | -0.14384177600049 |
| H | 0.85793329791735  | 0.74037002120719  | -0.00473875873035 |
| H | -2.59350407473455 | -1.86327035520057 | 0.08987620861022  |

|   |                   |                   |                  |
|---|-------------------|-------------------|------------------|
| H | -1.61811499487258 | 0.42884797873453  | 0.09723801940000 |
| O | 4.47738581684845  | -4.35182433827602 | 0.41150325658731 |
| H | 3.56110804275585  | -4.05166397600421 | 0.21448981359975 |
